# Supplementary material
Source: PubMed Central journal article supplement (PMC6714573)
Supplement: NIHMS1532598-supplement-10995_2019_2764_MOESM1_ESM.pdf [file NIHMS1532598-supplement-10995_2019_2764_MOESM1_ESM.pdf]

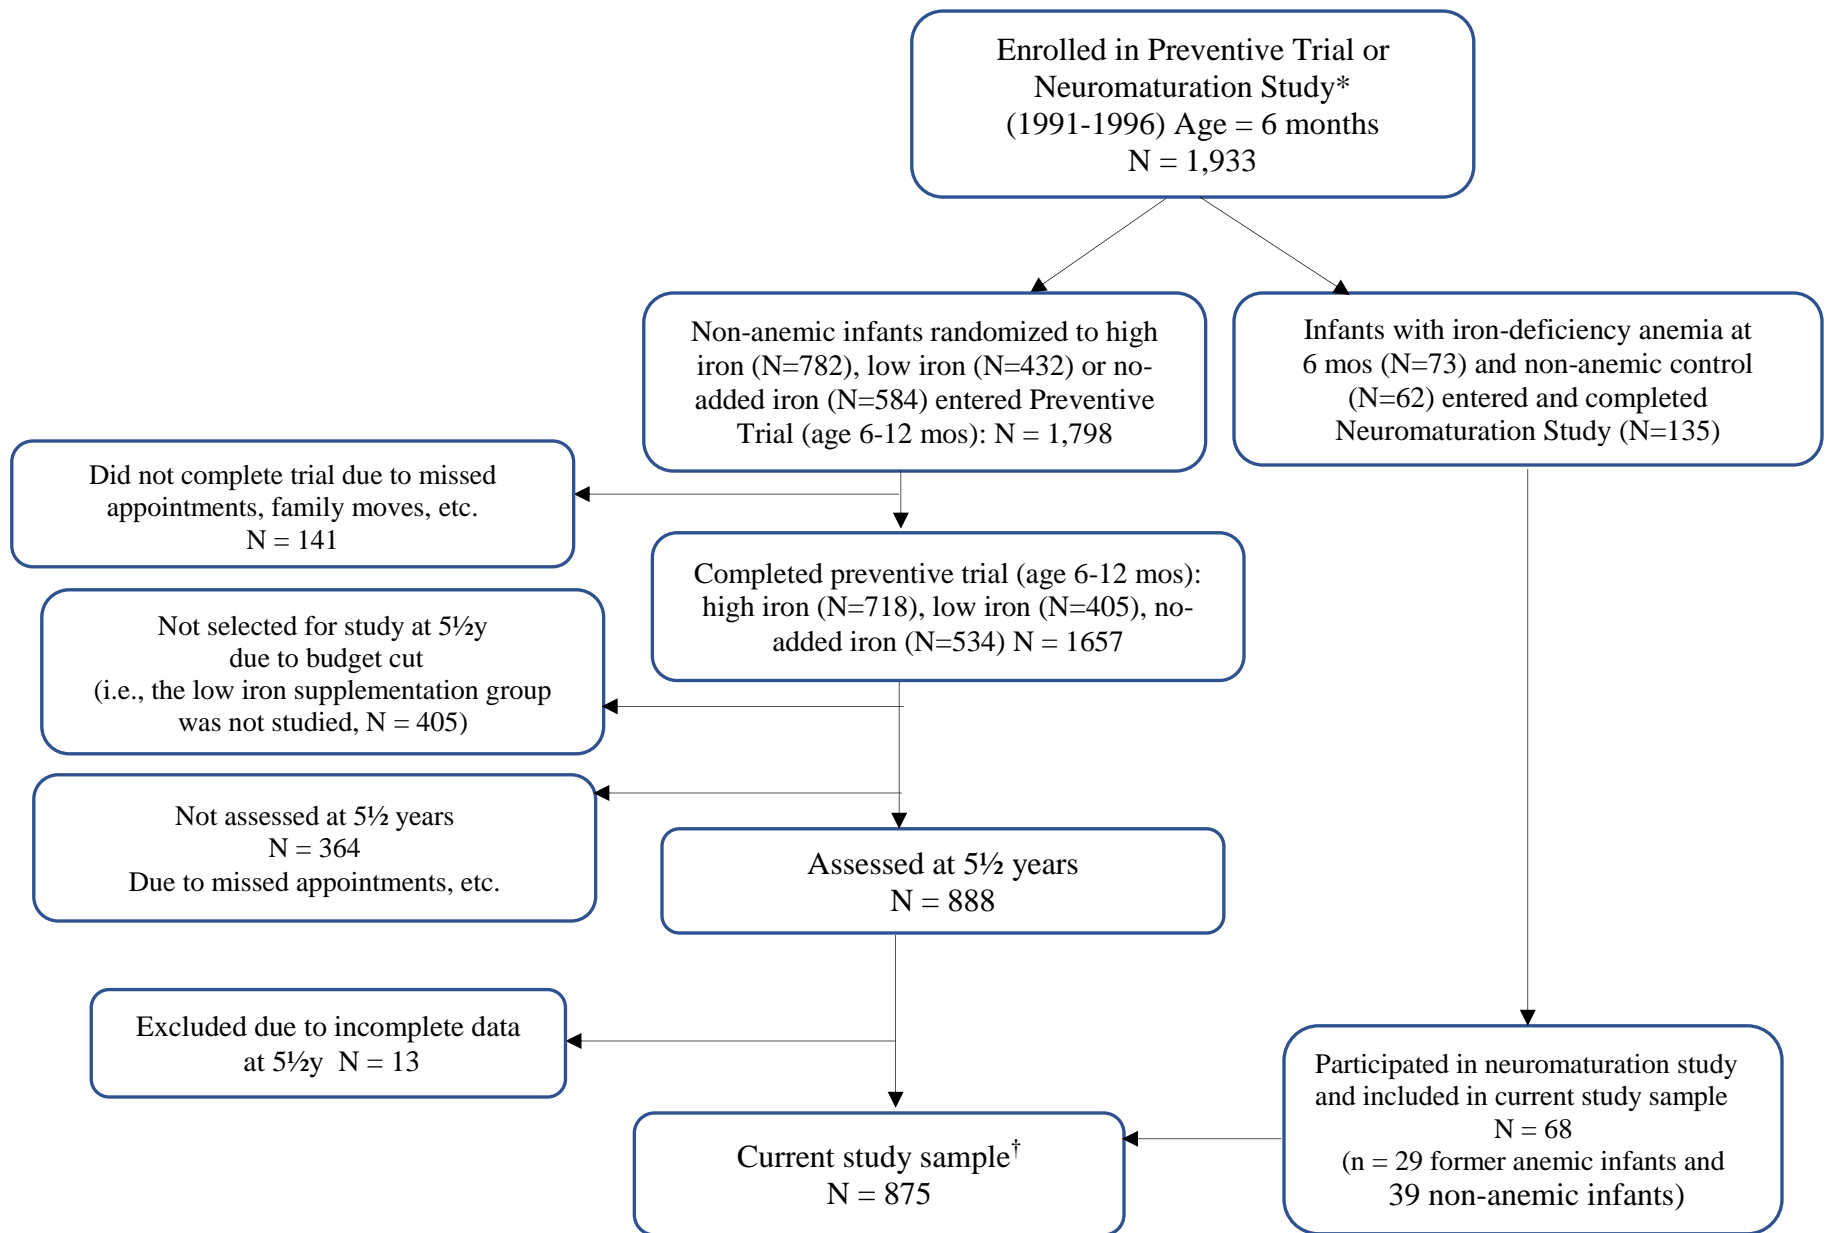

Supplemental Figure 1. Flowchart of sample selection. \*Participants in the neuromaturation study completed laboratory assessments and assessments of the main study. †The current study sample involves participants who had complete data at 5 years (see Table 1).

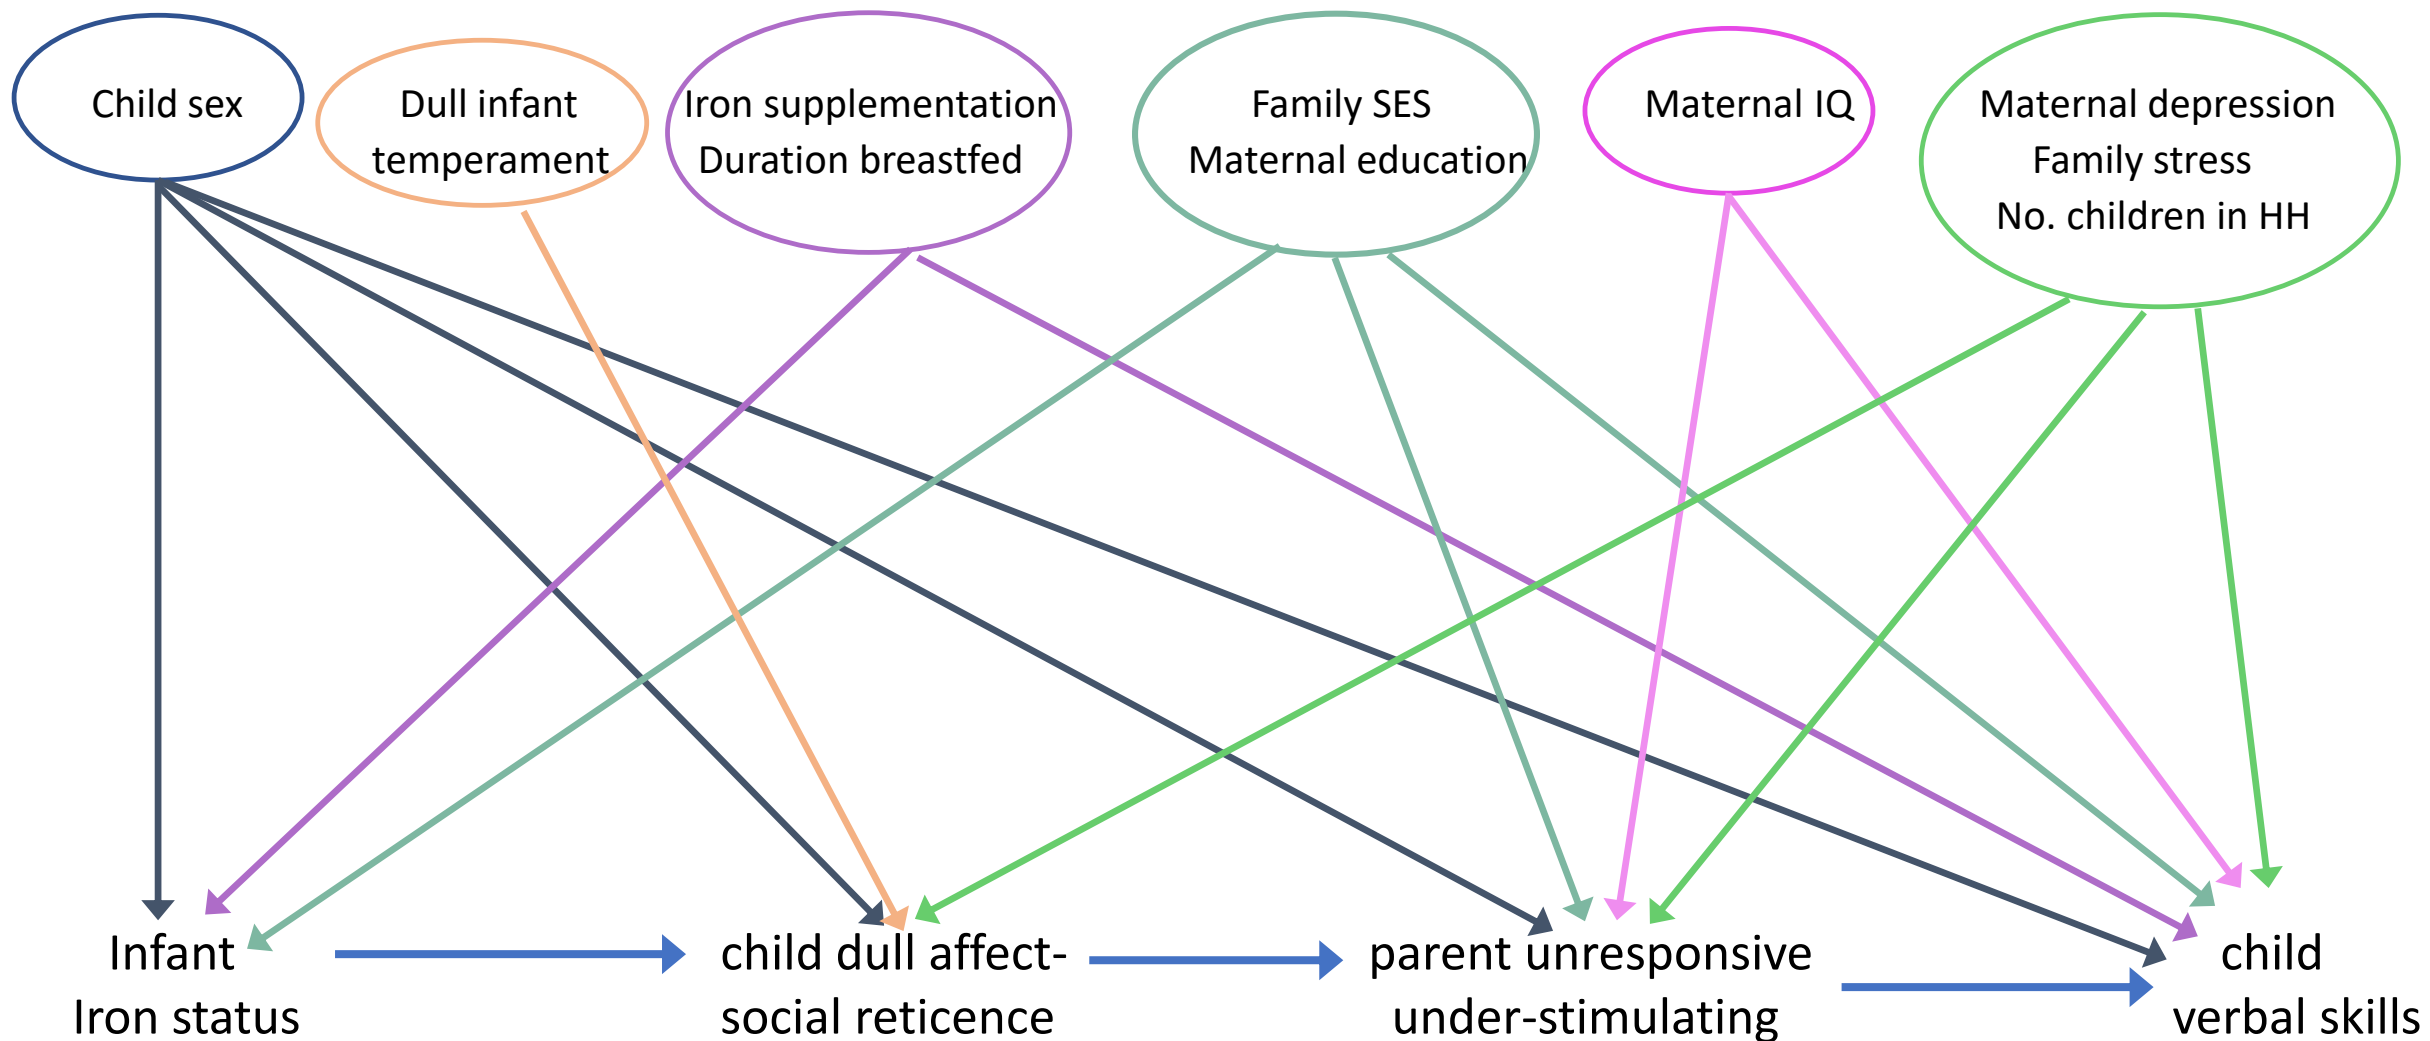

Supplemental Figure 2. A model showing the placement of all covariates.
